# Supplementary material for: Evolutionary conservation of Trichomonas-mycoplasma symbiosis across the host species barrier
Source: Front Microbiol. 2023 Sep 20;14:1242275. doi: 10.3389/fmicb.2023.1242275 (PMC10557491; doi:10.3389/fmicb.2023.1242275)
Supplement: Supplementary file 1 [file Table_1.XLSX]

## Sheet: Sheet1
Name	Accession	Length (bp)	Coverage	Top BLAST hit locus	BLAST hit species	BLAST hit accession	BLAST e-value
NODE_1		5973	37581	23S ribosomal RNA	Mycoplasma girerdii	CP020122.1	0
NODE_2		387	12	Elongation factor Tu	Mycoplasma girerdii	CP020122.1	2e-86
NODE_3		242	54	RNase P RNA component class B	Mycoplasma pneumoniae	CP039761.1	2e-20
NODE_4		225	4	NA	Mycoplasma girerdii	CP020122.1	3e-07
NODE_5		201	5	rubrerythrin	Mycoplasma girerdii	CP020122.1	2e-43
NODE_6		177	4	Elongation factor Tu	Mycoplasma girerdii	CP020122.1	4e-45
NODE_7		167	2	30S ribosomal protein S5	Mycoplasma girerdii	CP020122.1	3e-21
NODE_8		159	1	NA	NA	NA	NA
NODE_9		158	1	tRNA-Met	Uncultured Mycoplasmataceae bacterium	MN991199.1	2e-67
NODE_10		156	2	50S ribosomal protein L21	Mycoplasma girerdii	CP020122.1	5e-28
NODE_11		156	1	anaerobic ribonucleoside-triphosphate reductase	Mycoplasma girerdii	CP020122.1	3e-15
NODE_12		155	4	50S ribosomal protein L3	Mycoplasma girerdii	CP020122.1	7e-32
NODE_13		151	2	50S ribosomal protein L35	Mycoplasma girerdii	CP020122.1	7e-27
NODE_14		150	3	NA	NA	NA	NA
NODE_15		129	26	5S ribosomal RNA	Mycoplasma girerdii	CP020122.1	5e-32
