# Supplementary material for: Evolutionary conservation of Trichomonas-mycoplasma symbiosis across the host species barrier
Source: Front Microbiol. 2023 Sep 20;14:1242275. doi: 10.3389/fmicb.2023.1242275 (PMC10557491; doi:10.3389/fmicb.2023.1242275)
Supplement: Supplementary file 2 [file Table_2.XLSX]

## Sheet: ortholog_mapping
Identifier gene family	Annotation	Identifier gene family	Accession for Mycoplamsa imitans ATCC 51306	Alignment lenth	Alignment lenth - after BMGE	Model selected by IQ-tree	Note
1064at2085	Spermidine/putrescine import ATP-binding protein PotA	1064at2085	WP_027122092.1	711	336	LG+F+R5
1140at2085	GTPase Der	1140at2085	WP_027122356.1	499	359	LG+F+R5
1146at2085	Signal recognition particle protein	1146at2085	WP_027121985.1	498	360	LG+I+G4
1182at2085	Aspartyl/glutamyl-tRNA(Asn/Gln) amidotransferase subunit B	1182at2085	WP_027121787.1	664	290	LG+F+I+G4
1184at2085	Asparagine--tRNA ligase	1184at2085	WP_027121946.1	496	364	LG+F+R6
1307at2085	Arginine--tRNA ligase	1307at2085	WP_027122283.1	670	320	LG+F+I+G4
1328at2085	Serine--tRNA ligase	1328at2085	WP_027122268.1	456	306	LG+F+R6
148at2085	Elongation factor G	148at2085	WP_027121844.1	719	663	LG+R4
1519at2085	DNA-directed RNA polymerase, insert domain	1519at2085	WP_051420935.1	435	227	LG+I+G4
157at2085	Isoleucine--tRNA ligase	157at2085	WP_027122102.1	993	659	LG+F+R6
1617at2085	Ribosomal protein L2	1617at2085	WP_027122179.1	290	274	LG+R4
1683at2085	Ribosome-binding ATPase YchF	1683at2085	WP_027122229.1	530	287	LG+F+R6
1693at2085	Ribose-phosphate pyrophosphokinase	1693at2085	WP_027121810.1	373	272	LG+F+R5
1830at2085	Cysteine--tRNA ligase	1830at2085	WP_027122242.1	665	239	LG+F+R6
1993at2085	Tryptophan--tRNA ligase	1993at2085	WP_051420937.1	408	251	LG+F+I+G4
2000at2085	Tyrosine--tRNA ligase	2000at2085	WP_027121986.1	453	284	LG+F+R6
2092at2085	tRNA-specific 2-thiouridylase	2092at2085	WP_027122390.1	700	300	LG+F+R5
2279at2085	Xylose isomerase-like superfamily	2279at2085	WP_027121873.1	842	181	LG+F+G4	Was not included in the final concatenated alignment
2451at2085	Protein RecA	2451at2085	WP_027122095.1	389	271	LG+F+R5
2529at2085	Histidine--tRNA ligase	2529at2085	WP_027122335.1	581	231	LG+I+G4
2558at2085	Metallophosphoesterase, YmdB-like	2558at2085	WP_027121883.1	328	180	LG+I+G4
2568at2085	K Homology domain	2568at2085	WP_027122181.1	438	199	LG+I+G4
2868at2085	tRNA N6-adenosine threonylcarbamoyltransferase	2868at2085	WP_027122088.1	399	234	LG+F+R5
2930at2085	Ribosomal RNA small subunit methyltransferase H	2930at2085	WP_027121908.1	362	205	LG+F+I+G4
2936at2085	RNA-binding S4 domain	2936at2085	WP_027121841.1	217	164	LG+I+G4
3036at2085	Ribosomal protein L5	3036at2085	WP_027122187.1	200	172	LG+G4
3195at2085	ATP synthase, F1 complex, gamma subunit	3195at2085	WP_027121999.1	342	136	LG+F+I+G4
3282at2085	RNA-binding S4 domain	3282at2085	WP_027122028.1	419	145	LG+F+I+G4
3406at2085	Uridylate kinase	3406at2085	WP_027122407.1	334	210	LG+F+I+G4
3517at2085	Ribosomal protein S12, bacterial-type	3517at2085	WP_027121842.1	157	132	LG+I+G4
3531at2085	Ribosomal protein L11, C-terminal	3531at2085	WP_027122231.1	215	140	LG+F+G4
3550at2085	Inorganic pyrophosphatase	3550at2085	WP_027121961.1	513	161	LG+F+G4
3895at2085	Adenylate kinase	3895at2085	WP_027122194.1	268	114	LG+I+G4
3914at2085	Ribosomal protein L16	3914at2085	WP_027122182.1	160	133	LG+G4
3960at2085	Ribosomal protein L13	3960at2085	WP_027121988.1	159	138	LG+G4
4100at2085	Ribosomal protein S7 domain	4100at2085	WP_027121843.1	158	155	LG+G4
4128at2085	Ribosomal protein L14P	4128at2085	WP_027122185.1	125	122	LG+I+G4
4184at2085	Ribosomal protein L24	4184at2085	WP_027122186.1	138	88	LG+I+G4
4319at2085	Ribosomal protein S10	4319at2085	WP_027122175.1	133	85	LG+I+G4
4322at2085	Ribosomal protein S9	4322at2085	WP_027121989.1	166	112	LG+G4
4330at2085	Ribosomal protein S13	4330at2085	WP_027121764.1	165	121	LG+I+G4
4353at2085	Ribosomal protein L15	4353at2085	WP_027122192.1	194	122	WAG+I+G4
4367at2085	Transcription elongation factor GreA	4367at2085	WP_027122327.1	200	118	LG+I+G4
4388at2085	Ribosomal protein S11	4388at2085	WP_027121765.1	152	118	LG+I+G4
4555at2085	Thymidylate kinase	4555at2085	WP_027122267.1	277	114	LG+I+G4
462at2085	Leucine--tRNA ligase	462at2085	WP_027122059.1	889	491	LG+F+R5
4759at2085	Ribosomal protein S19, bacterial-type	4759at2085	WP_011113284.1	104	84	LG+I+G4
5328at2085	Ribosomal protein L7/L12, C-terminal	5328at2085	WP_027122362.1	143	122	LG+F+R3
534at2085	Valine--tRNA ligase	534at2085	WP_027121816.1	982	579	LG+F+R6
543at2085	DNA-directed DNA polymerase	543at2085	WP_027121939.1	1222	412	LG+F+R5
56at2085	DNA polymerase III PolC-type	56at2085	WP_027122412.1	1767	756	LG+F+R6
584at2085	DNA polymerase III subunit gamma/tau	584at2085	WP_036459386.1	991	198	mtZOA+F+I+G4
705at2085	Elongation factor Tu	705at2085	WP_027122125.1	408	394	LG+I+G4
801at2085	Translation initiation factor IF-2	801at2085	WP_027122206.1	907	514	LG+F+R5
908at2085	Aspartate--tRNA ligase	908at2085	WP_027122334.1	661	384	LG+F+R5
